# Supplementary material for: Reprocessable polyurethane elastomers based on reversible ketal exchange: dielectric properties and water resistance
Source: Royal Society of Chemistry journal article supplement (doi:10.1039/d2tc04603b), 2022-12-15
Supplement: d2tc04603b1.pdf [file d2tc04603b1.pdf]

## Reprocessable polyurethane elastomers based on reversible ketal exchange: Dielectric properties and water resistance

Jianrong Dong<sup>1</sup>, Hongye Yan<sup>1\*</sup>, Xinhai Lv<sup>1</sup>, Zhenbang Wang<sup>1</sup>, Zixuan Rao<sup>1</sup>, Bailin Zhu<sup>2</sup>, Jun Wu<sup>2</sup>, Yu Zhou<sup>1</sup>, Hongxiang Chen<sup>1,3,\*</sup>

<sup>1</sup> School of Chemistry and Chemical Engineering, Wuhan University of Science and Technology, Wuhan 430081, China

<sup>2</sup> The State Key Laboratory of Refractory and Metallurgy, Wuhan University of Science and Technology, Wuhan 430081, China

<sup>3</sup> Key Laboratory of Catalysis and Energy Materials Chemistry of Ministry of Education & Hubei Key Laboratory of Catalysis and Materials Science, South-Central University for Nationalities, Wuhan 430074, China

Corresponding author.

E-mail address: hyyan@wust.edu.cn

E-mail address: chenhx\_916@hotmail.com; chenhongxiang@wust.edu.cn

### *Supplementary information*

|                                                                                       |    |
|---------------------------------------------------------------------------------------|----|
| 1. Exchange reaction of ketal-containing model compounds .....                        | 2  |
| 2. <sup>1</sup> H NMR spectra of reaction mixture .....                               | 3  |
| 3. FTIR spectra of reaction mixture .....                                             | 4  |
| 4. Index of hydrogen bonding for polyurethane networks .....                          | 5  |
| 5. Tensile strength, elongation at break, and Young's modulus of KCPU-x.....          | 6  |
| 6. Contact angles of KCPU-x .....                                                     | 7  |
| 7. Comparison of KCPU-4 and other dielectric elastomers in the literature .....       | 8  |
| 8. Stress relaxation of KCPU-x at different temperatures.....                         | 9  |
| 9. Difference in the gauge length before and after stress relaxation .....            | 10 |
| 10. Stress-strain curves of KCPU-x for three cyclic loading at high temperature ..... | 11 |
| 11. Stress-strain curves of KCPU-x for three cyclic loading at high temperature ..... | 12 |
| 12. Healing of KCPU-x .....                                                           | 13 |
| 13. Recovery efficiency of reprocessing samples .....                                 | 14 |
| References .....                                                                      | 15 |

## 1. Exchange reaction of ketal-containing model compounds

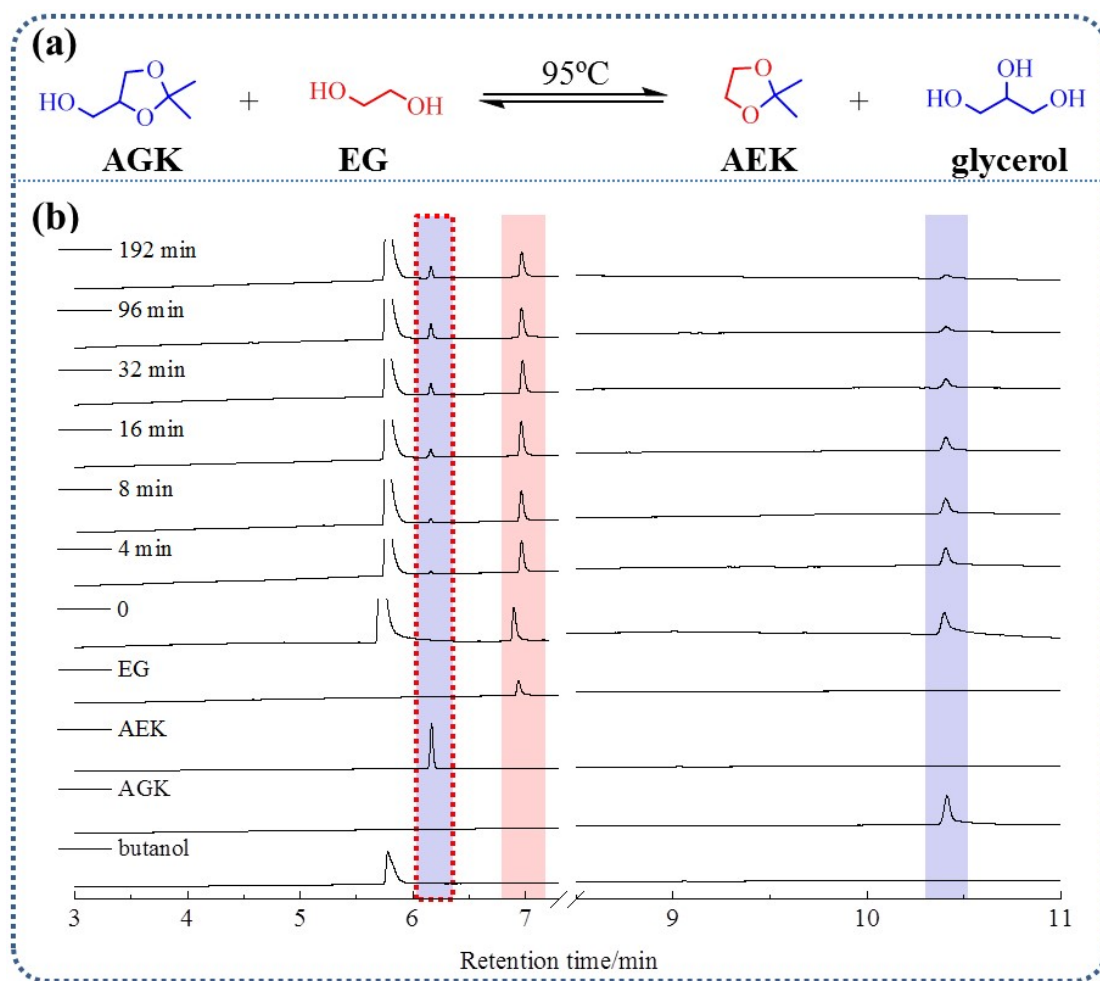

Figure S1 (a) Schematic diagram of exchange reaction between AGK and EG; (b) Gas chromatography of reaction mixtures at different time scales

## 2. $^1\text{H}$ NMR spectra of reaction mixture

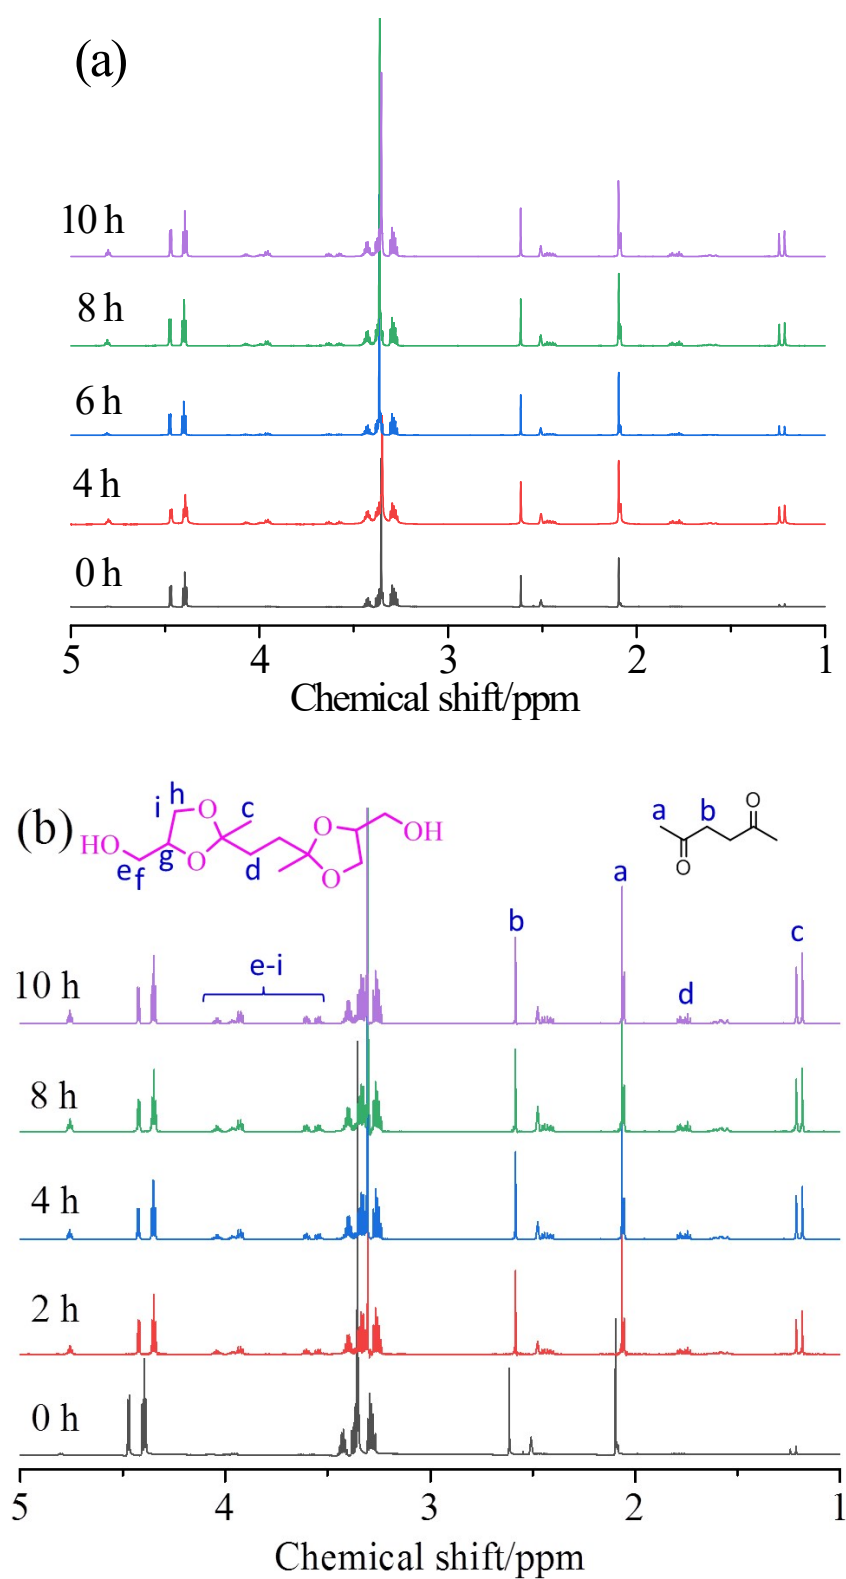

Figure S2  $^1\text{H}$  NMR spectra of reaction mixture of HDO and glycerol at different time scales: (a) 80 °C; (b) 90 °C

### 3. FTIR spectra of reaction mixture

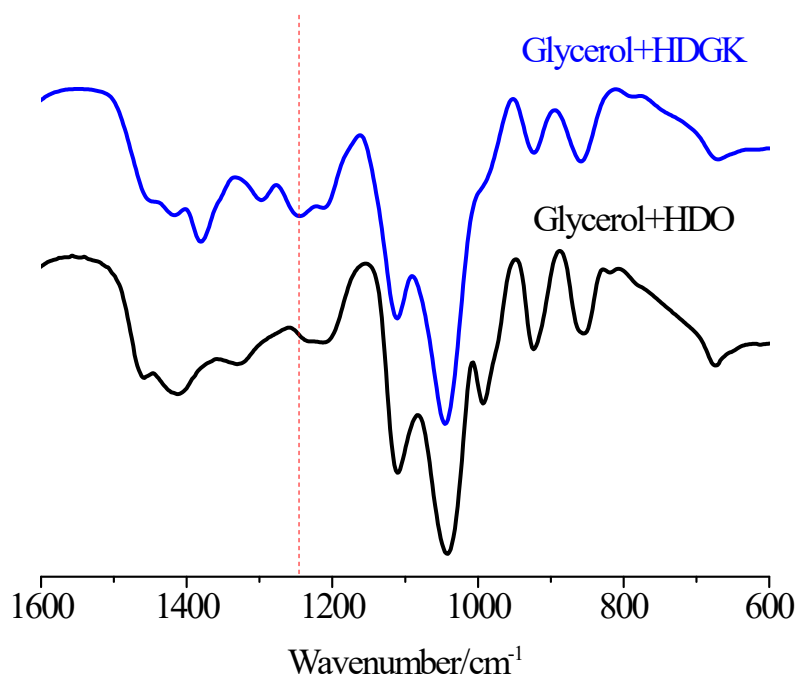

**Figure S3** FTIR spectra of the filtrate after 11 h of reaction, the mixture of glycerol and 2,5-hexadione

#### 4. Index of hydrogen bonding for polyurethane networks

Table S1 Bands, absorbance ratio of C=O stretching vibration, and index of hydrogen bonding ( $X_B$ ) for polyurethane networks

| Samples | Free C=O | Bonded C=O | $A_F/A_B$ | $X_B$ |
|---------|----------|------------|-----------|-------|
| KCPU-0  | 1731     | 1708       | 0.43      | 0.68  |
| KCPU-1  | 1732     | 1710       | 0.26      | 0.78  |
| KCPU-2  | 1732     | 1709       | 0.21      | 0.81  |
| KCPU-3  | 1732     | 1709       | 0.25      | 0.78  |
| KCPU-4  | 1733     | 1711       | 0.31      | 0.74  |

## 5. Tensile strength, elongation at break, and Young's modulus of KCPU-x

Table S2 Tensile strength, elongation at break, Young's modulus, and healing efficiency of samples before and after healing at 100 °C for 5 h

| Samples | Original samples    |                  |                | Healed samples      |                  |                | $\eta/\%$ |
|---------|---------------------|------------------|----------------|---------------------|------------------|----------------|-----------|
|         | $\sigma/\text{MPa}$ | $\varepsilon/\%$ | $E/\text{MPa}$ | $\sigma/\text{MPa}$ | $\varepsilon/\%$ | $E/\text{MPa}$ |           |
| KCPU-0  | 8.04±2.39           | 673±41           | 3.0±0.4        | 1.70±0.42           | 221±165          | 1.7±0.3        | 21.1      |
| KCPU-1  | 11.79±0.79          | 724±80           | 5.0±0.5        | 1.81±0.18           | 147±18           | 4.4±0.6        | 15.4      |
| KCPU-2  | 10.01±1.10          | 620±55           | 6.8±1.0        | 2.79±0.09           | 414±15           | 5.6±0.4        | 27.8      |
| KCPU-3  | 9.78±1.45           | 596±67           | 3.8±0.2        | 4.86±0.37           | 424±58           | 3.7±0.9        | 49.6      |
| KCPU-4  | 5.30±0.51           | 617±137          | 3.2±0.6        | 3.54±0.34           | 509±61           | 3.0±0.5        | 66.7      |

$\sigma$  is the tensile strength,  $\varepsilon$  is the elongation at break, and  $E$  is the Young's modulus.

## 6. Contact angles of KCPU-x

Table S3 Advancing angles and Receding angles of KCPU-x

| Contact angle   | KCPU-0    | KCPU-1   | KCPU-2   | KCPU-3   | KCPU-4    |
|-----------------|-----------|----------|----------|----------|-----------|
| Advancing angle | 99.3±0.8  | 93.3±0.6 | 96.5±0.8 | 95.5±0.5 | 102.8±1.3 |
| Receding angle  | 101.0±1.2 | 94.3±2.5 | 97.5±1.4 | 95.7±1.1 | 102.5±1.1 |

## 7. Comparison of KCPU-4 and other dielectric elastomers in the literature

**Table S4** Dielectric constant, dielectric loss, and dielectric loss factor of acrylic and silicone elastomers in the literature

| Dielectric Elastomers     | Polymers        | Dielectric properties at 10 <sup>3</sup> Hz |              |               | Reference |
|---------------------------|-----------------|---------------------------------------------|--------------|---------------|-----------|
|                           |                 | $\epsilon'$                                 | $\epsilon''$ | $\tan \delta$ |           |
| PMMA-3                    | Acrylic polymer | 4.3                                         | 0.044        | 0.01          | 1         |
| MBM 104 TPEGs             | Acrylic polymer | 4.6                                         |              |               | 2         |
| VHB 4905                  | Acrylic polymer | 4.7                                         |              |               | 3         |
| Wacker Elastosil® 2030/20 | siloxane        | 2.8                                         |              |               | 3         |
| BDDA                      | siloxane        | 4.6                                         | 0.1          | 0.022         | 4         |
| Si-B_IN30                 | siloxane        | 4.3                                         | 0.047        | 0.011         | 5         |
| TC5005-40                 | siloxane        | 4.4                                         | 0.11         | 0.025         | 6         |

**Table S5** Dielectric constant, dielectric loss, dielectric loss factor, and reprocessing temperature of polyurethane elastomers in the literature and KCPU-4 in this work

| Dielectric Elastomers         | Dielectric properties at 10 <sup>3</sup> Hz |              |               | Reprocessing temperature/°C | Reference        |
|-------------------------------|---------------------------------------------|--------------|---------------|-----------------------------|------------------|
|                               | $\epsilon'$                                 | $\epsilon''$ | $\tan \delta$ |                             |                  |
| 6FDA-15-A                     | 1.5                                         | 0.023        | 0.015         | -                           | 7                |
| PU(26 h RT-cure in dried air) | 3.2                                         | 0.202        | 0.063         | -                           | 8                |
| PU(end of RT-cure)            | 3.0                                         | 0.45         | 0.15          | -                           | 9                |
| PPG-MDI-TMP                   | 8.6                                         | 1.032        | 0.12          | -                           | 10               |
| p(BA-HEA)@MDI-1               | 7.1                                         | 0.284        | 0.04          | -                           | 11               |
| Polyether-HDI-BD              | 8.1                                         | 0.203        | 0.025         | -                           | 12               |
| PDET-MDI-BD                   | 1.5                                         | 0.03         | 0.02          | -                           | 13               |
| PU1400                        | 7.0                                         | 0.7          | 0.1           | -                           | 14               |
| BPU3                          | 7.5                                         | 0.338        | 0.045         | -                           | 15               |
| PU-41.03% PVP                 | 5.5                                         | 0.385        | 0.07          | -                           | 16               |
| Soybean Polyol-MDI            | 6.1                                         | 0.549        | 0.09          | -                           | 17               |
| Polyol-MDI-Gly-BD             | 5.0                                         | 0.6          | 0.12          | -                           | 18               |
| PU702                         | 7.2                                         | 1.512        | 0.21          | -                           | 19               |
| Polyether-HDI-CO-BD           | 10.2                                        | 1.02         | 0.1           | -                           | 20               |
| Capa™2085                     | 8.9                                         | 0.712        | 0.08          | -                           | 21               |
| PU-7LNP                       | 20.0                                        | 4.4          | 0.22          | 120                         | 22               |
| <b>KCPU-4</b>                 | <b>11.9</b>                                 | <b>0.536</b> | <b>0.045</b>  | <b>95</b>                   | <b>This work</b> |

$\epsilon'$ , Dielectric constant;  $\epsilon''$ , dielectric loss;  $\tan \delta$ , dielectric loss factor.



## 8. Stress relaxation of KCPU-x at different temperatures

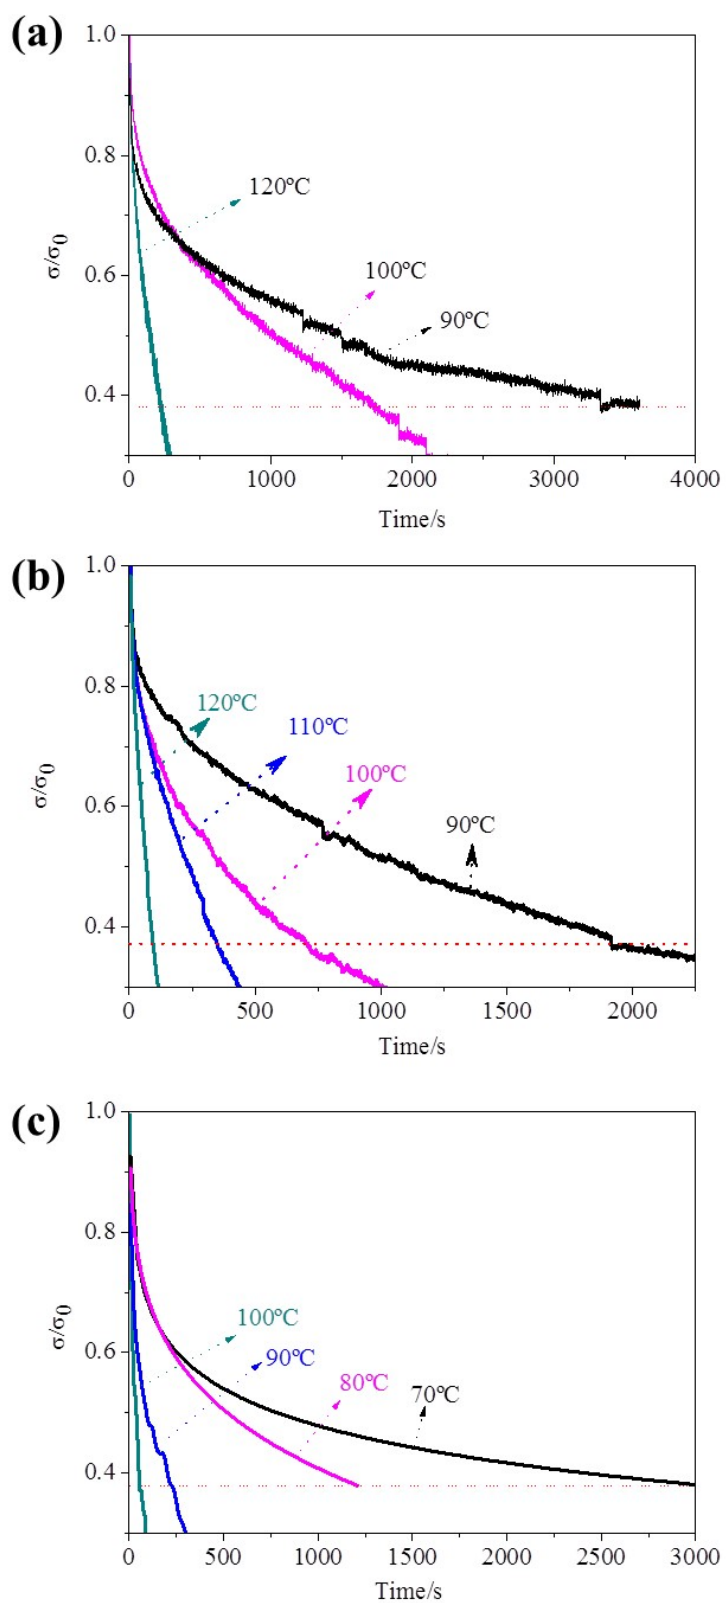

Figure S4 Stress relaxation curves of samples at different temperatures: (a) KCPU-1, (b) KCPU-2, (c) KCPU-4

## 9. Difference in the gauge length before and after stress relaxation

(a)

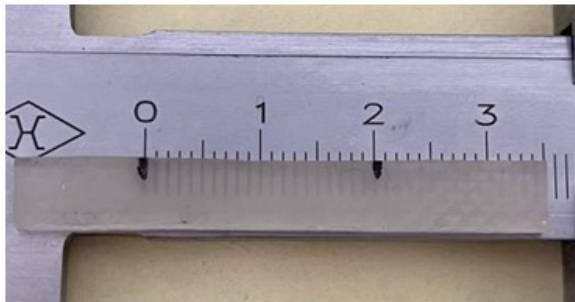

(b)

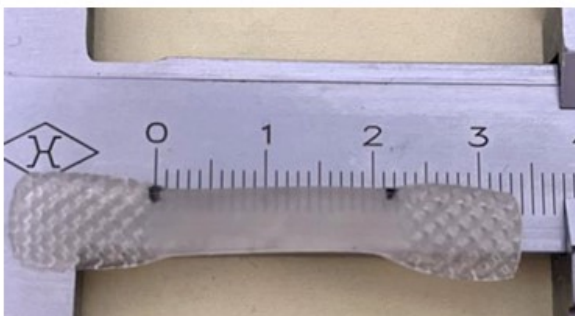

Figure S5 Length difference between two marked points: (a) the original KCPU-3 and (b) the cooled KCPU-3 after stress relaxation at 90 °C

## 10. Stress-strain curves of KCPU-x for three cyclic loading at high temperature

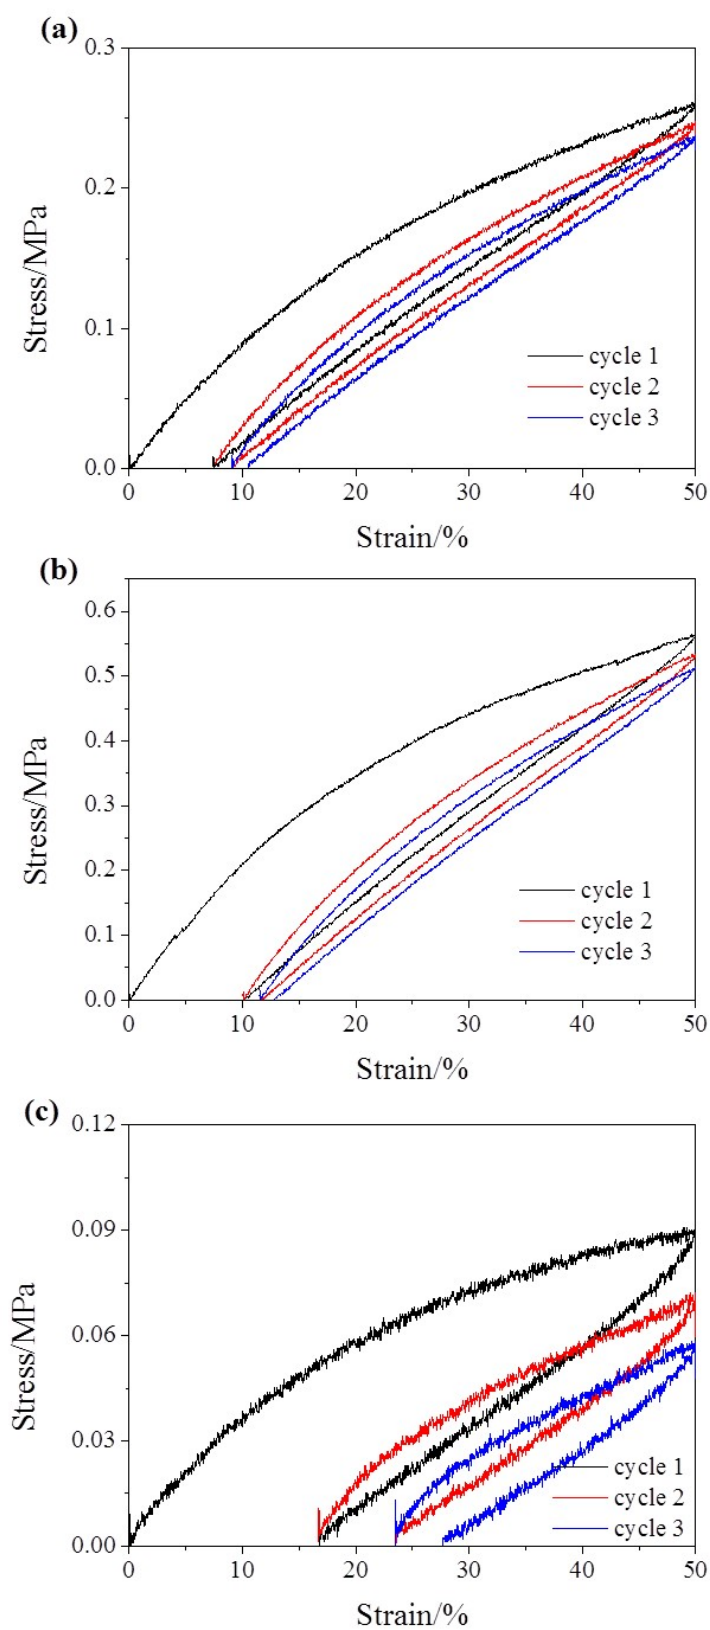

Figure S6 Stress-strain curves for three cyclic loading at 100 °C: (a) KCPU-1, (b) KCPU-2, and (c) KCPU-4

## 11. Stress-strain curves of KCPU-x for three cyclic loading at high temperature

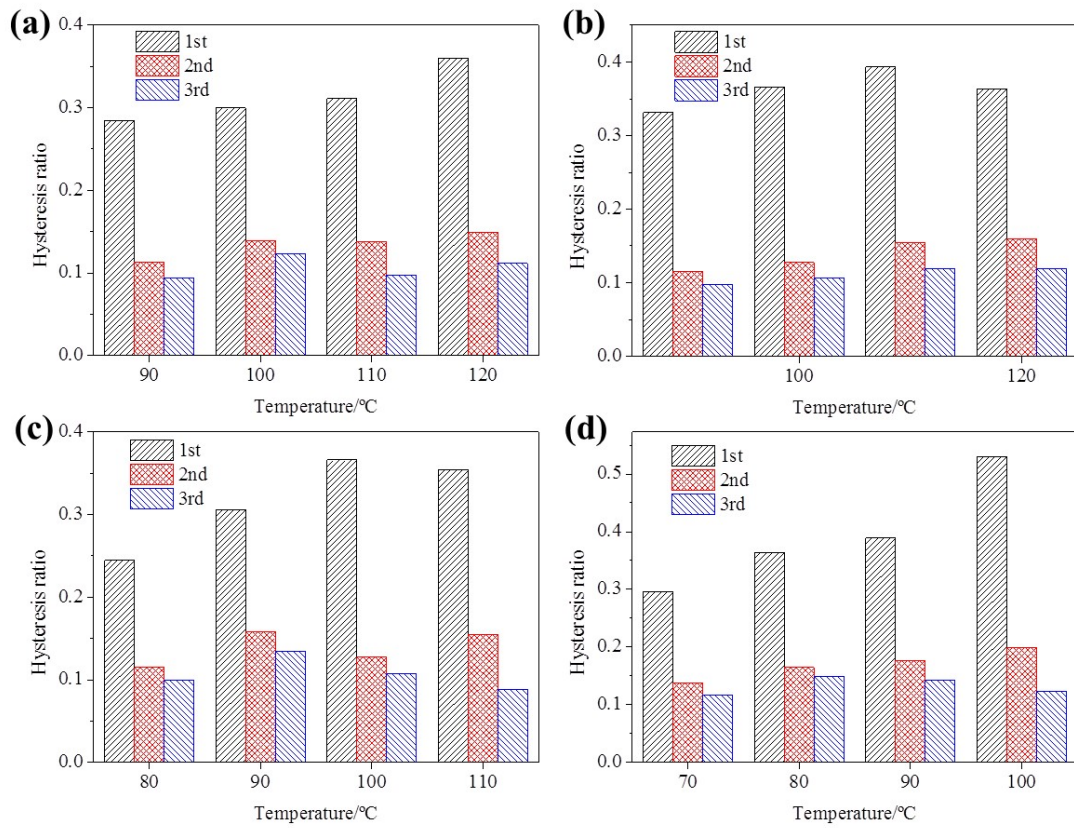

Figure S7 Temperature dependence of hysteresis loop area at different load-unload cycles: (a) KCPU-1, (b) KCPU-2, (c) KCPU-3, and (d) KCPU-4

## 12. Healing of KCPU-x

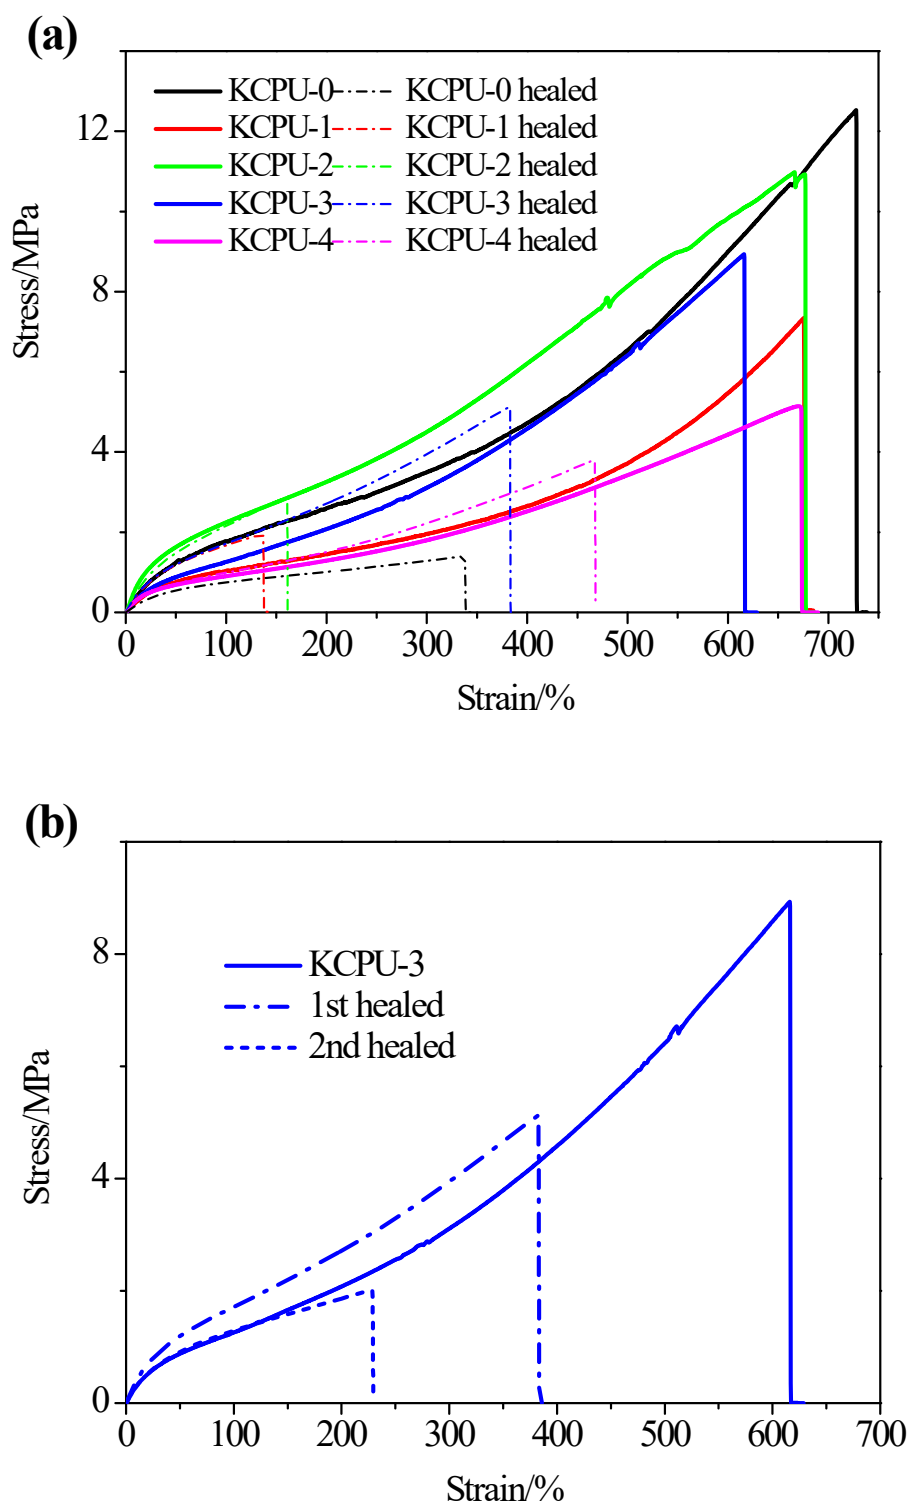

Figure S8 (a) Stress-strain curves of original and healed KCPU-x, (b) Stress-strain curves of KCPU-3 after repetitive healing experiments

### 13. Recovery efficiency of reprocessing samples

Table S6 Reprocessing temperature and recovery efficiency of KCPU-*x* samples in the tensile strength and elongation at break

| Samples | Temperature of reprocessing/°C | Recovery efficiency of tensile strength/% | Recovery efficiency of elongation at break/% |
|---------|--------------------------------|-------------------------------------------|----------------------------------------------|
| KCPU-0  | 140                            | 40.3±2.1                                  | 51.1±10.5                                    |
| KCPU-1  | 120                            | 24.3±0.8                                  | 33.8±2.5                                     |
| KCPU-2  | 110                            | 35.8±4.6                                  | 31.5±5.2                                     |
| KCPU-3  | 100                            | 23.8±1.7                                  | 39.7±3.5                                     |
| KCPU-4  | 95                             | 74.7±2.3                                  | 69.4±2.4                                     |

## References

1. J. Chen, Y. Wang and W. Chen, *J. Mater. Chem. C*, **2021**, 9, 5000-5007.
2. P. H. Vargantwar, A. E. Özçam, T. K. Ghosh, and R. J. Spontak, *Adv. Funct. Mater.*, **2012**, 22, 2100-2113.
3. F. B. Albuquerque and H. Shea, *Smart Mater. Struct.*, **2019**, 28, 075042.
4. A. Chortos, E. Hajiesmaili, J. Morales, D. R. Clarke and J. A. Lewis, *Adv. Funct. Mater.*, **2020**, 30, 1907375.
5. F. B. Madsen, L. Yu and A. L. Skov, *ACS Macro Lett.*, **2016**, 5, 1196-1200.
6. F. Galantini, F. Carpi and G. Gallone, *Smart Mater. Struct.*, **2013**, 22, 104020.
7. Y. Li, B. Ma, R. Zhang and X. Luo, *Polymer*, 2022, **253**, 125035.
8. B. Zimmer, C. Nies, C. Schmitt, C. Paulo and W. Possart, *Polymer*, 2018, **149**, 238-252.
9. B. Zimmer, C. Nies, C. Schmitt and W. Possart, *Polymer*, 2017, **115**, 77-95.
10. S. Desai, I.M. Thakore, B.D. Sarawade and S. Devi, *Eur. Polym. J.*, 2000, **36**, 711-725.
11. Y. Zhao, J. Zha, L. Yin, S. Li, Y. Wen and Z. Dang, *Polymer*, 2018, **149**, 39-44.
12. S. Oprea, O. Potolinca and V. Oprea, *High Perform. Polym.*, 2011, **23**, 49-58.
13. A. Marcos-Fernandez, R. Navarro, E. Benito, J. Guzman and L. Garrido, *Eur. Polym. J.*, 2021, **155**, 110576.
14. K. Raftopoulos, B. Janowski, L. Apekis, K. Pielichowski and P. Pissis, *Eur. Polym. J.*, 2011, **47**, 2120-2133.
15. S. Oprea, *J. Polym. Res.*, 2011, **18**, 1777-1785.
16. L. V. Karabanova, G. Boiteux, O. Gain, G. Seytre, L. M. Sergeeva, E. D. Lutsyk and P. A. Bondarenko, *J. Appl. Polym. Sci.*, 2003, **90**, 1191-1201.
17. A. Zlatanic, C. Lava, W. Zhang and Z. S. Petrovic, *J. Polym. Sci. B*, 2004, **42**, 809-819.
18. S. Oprea, V. Musteata and V. O. Potolinca, *J. Elastomers Plast.*, 2011, **43**, 559-575.
19. Z. S. Petrovic, I. Javni and G. Banhegy, *J. Polym. Sci. B*, 1998, **36**, 237-251.
20. S. Oprea, *J. Appl. Polym. Sci.*, 2011, **119**, 2196-2204.
21. M. Zajac, H. Kahl, B. Schade, T. Rodel, M. Dionisio and M. Beiner, *Polymer*, 2017, **111**, 83-90.
22. G. Qi, W. Yang, D. Puglia, H. Wang, P. Xu, W. Dong, T. Zheng and P. Ma, *Mater. Des.*, 2020, **196**, 109150.
